# Supplementary material for: Synthesis, crystal structure and biological properties of a bismuth(iii) Schiff-base complex
Source: Royal Society of Chemistry journal article supplement (doi:10.1039/c5ra19370b), 2015-01-01
Supplement: c5ra19370b1.pdf [file c5ra19370b1.pdf]

## SUPPLEMENTARY MATERIAL

### **Synthesis, crystal structure and biological properties of a bismuth(III) Schiff-base complex**

Chuan-Hua Li,<sup>a</sup> Jian-Hong Jiang,<sup>a</sup> Xu Li,<sup>a</sup> Li-Ming Tao,<sup>a</sup> Sheng-Xiong Xiao,<sup>a</sup>  
Hui-Wen Gu,<sup>b</sup> Hui Zhang,<sup>a</sup> Chao Jiang,<sup>a</sup> Jin-Qi Xie,<sup>a</sup> Meng-Na Peng,<sup>a</sup> Lan-Lan  
Pan,<sup>a</sup> Xian-Ming Xia<sup>a</sup> and Qiang-Guo Li<sup>\*a</sup>

<sup>a</sup> Hunan Provincial Key Laboratory of Xiangnan Rare-Precious Metals compounds and Applications, Department of Chemistry and Life Science, Xiangnan University, Chenzhou 423000, Hunan Province, PR China.

<sup>b</sup> State Key Laboratory of Chemo/Biosensing and Chemometrics, College of Chemistry and Chemical Engineering, Hunan University, Changsha 410082, Hunan Province, PR China.

**Table S1** Partially selected bond lengths (Å) for the complex

| <b>Bonds</b> |          | <b>Bonds</b> |          | <b>Bonds</b> |          |
|--------------|----------|--------------|----------|--------------|----------|
| Bi(1)–O(1)   | 2.758(1) | Bi(1)–O(2)   | 2.601(1) | Bi(1)–O(10)  | 2.705(8) |
| Bi(1)–O(13)  | 2.124(8) | Bi(1)–O(15)  | 2.189(8) | Bi(1)–O(20)  | 2.170(8) |
| Bi(1)–O(25)  | 2.724(2) | Bi(2)–N(1)   | 2.401(1) | Bi(2)–N(2)   | 2.540(1) |
| Bi(2)–O(2)   | 2.425(9) | Bi(2)–O(3)   | 2.511(8) | Bi(2)–O(13)  | 2.242(9) |
| Bi(2)–O(14)  | 2.072(9) | Bi(2)–O(61)  | 2.878(2) | Bi(3)–O(3)   | 2.571(9) |
| Bi(3)–O(4)   | 2.781(9) | Bi(3)–O(11)  | 2.834(9) | Bi(3)–O(13)  | 2.110(8) |
| Bi(3)–O(17)  | 2.212(8) | Bi(3)–O(20)  | 2.193(8) | Bi(3)–O(63)  | 2.581(1) |
| Bi(4)–N(5)   | 2.430(9) | Bi(4)–N(6)   | 2.535(1) | Bi(4)–O(10)  | 2.396(7) |
| Bi(4)–O(11)  | 2.590(7) | Bi(4)–O(18)  | 2.285(8) | Bi(4)–O(20)  | 2.105(9) |
| Bi(5)–O(2)   | 2.789(2) | Bi(5)–O(5)   | 2.812(9) | Bi(5)–O(6)   | 2.586(8) |
| Bi(5)–O(14)  | 2.213(8) | Bi(5)–O(15)  | 2.184(9) | Bi(5)–O(16)  | 2.134(8) |
| Bi(6)–O(3)   | 2.842(1) | Bi(6)–O(7)   | 2.573(9) | Bi(6)–O(8)   | 2.812(8) |
| Bi(6)–O(7)   | 2.573(9) | Bi(6)–O(14)  | 2.196(9) | Bi(6)–O(16)  | 2.098(8) |
| Bi(6)–O(17)  | 2.229(9) | Bi(6)–O(41)  | 2.610(1) | Bi(7)–O(7)   | 2.750(8) |
| Bi(7)–O(11)  | 2.621(8) | Bi(7)–O(12)  | 2.785(8) | Bi(7)–O(17)  | 2.139(9) |
| Bi(7)–O(18)  | 2.100(7) | Bi(7)–O(19)  | 2.187(7) | Bi(8)–O(6)   | 2.751(8) |
| Bi(8)–O(9)   | 2.815(7) | Bi(8)–O(10)  | 2.633(8) | Bi(8)–O(15)  | 2.214(9) |
| Bi(8)–O(18)  | 2.114(8) | Bi(8)–O(19)  | 2.165(7) | Bi(8)–O(21)  | 2.719(9) |
| Bi(9)–N(3)   | 2.462(9) | Bi(9)–N(4)   | 2.492(1) | Bi(9)–O(6)   | 2.526(8) |
| Bi(9)–O(7)   | 2.517(8) | Bi(9)–O(16)  | 2.276(9) | Bi(9)–O(19)  | 2.127(8) |
